# Supplementary material
Source: PubMed Central journal article supplement (PMC3226780)

## SUPPORTING INFORMATION

### **Multi-Path Quenchers: Efficient Quenching of Common Fluorophores**

Pete Crisalli, Eric T. Kool\*

*Department of Chemistry, Stanford University  
Stanford, CA 94305-5080 (USA)*

\*e-mail: [kool@stanford.edu](mailto:kool@stanford.edu)

#### Table of Contents

|                                                                       |       |
|-----------------------------------------------------------------------|-------|
| Mass spectrometric data for quencher-conjugated oligonucleotides..... | p. S2 |
| Fluorescence spectra of quencher-conjugated oligonucleotides.....     | p. S3 |
| Absorbance properties of multiple pathway quenchers.....              | p. S4 |
| Ground state complex formation studies .....                          | p. S5 |
| NMR of synthetic intermediates.....                                   | p. S7 |

| Strand          | Mass<br>Calc | Mass<br>Observed | Purity<br>(HPLC) |
|-----------------|--------------|------------------|------------------|
| Alexa350 20mer  | 6543.110     | 6544.614         | 98.86%           |
| FAM 20mer       | 6678.201     | 6678.831         | 99.55%           |
| Cy3 20mer       | 6618.312     | 6617.014         | 99.86%           |
| TAMRA 20mer     | 6734.274     | 6734.328         | 99.30%           |
| ATTO590 20mer   | 6821.371     | 6822.563         | 98.02%           |
| Quasar670 20mer | 6743.396     | 6742.522         | 99.94%           |
| MPQ1 15mer      | 5156.014     | 5156.707         | 98.54%           |
| MPQ1 20mer      | 6676.244     | 6675.056         | 99.52%           |
| MPQ2 15mer      | 5206.029     | 5205.537         | 97.74%           |
| MPQ2 20mer      | 6726.259     | 6713.450         | 98.53%           |
| MPQ3 15mer      | 5200.040     | 5200.674         | 99.70%           |
| MPQ3 20mer      | 6720.270     | 6720.037         | 99.03%           |
| MPQ4 15mer      | 5053.971     | 5052.607         | 87.30%           |
| MPQ4 20mer      | 6576.191     | 6576.154         | 99.13%           |
| MPQ5 15mer      | 5233.040     | 5233.804         | N/A*             |
| MPQ5 20mer      | 6753.270     | 6754.076         | 96.04%           |
| MPQ6 15mer      | 5206.041     | 5205.809         | 99.29%           |
| MPQ6 20mer      | 6726.271     | 6724.371         | 99.15%           |
| DABCYL 15mer    | 5021.018     | 5021.461         | 98.55%           |
| DABCYL 20mer    | 6541.248     | 6541.436         | 98.19%           |
| BHQ2 15mer      | 5130.993     | 5129.682         | 98.55%           |
| BHQ2 20mer      | 6651.223     | 6650.192         | 99.18%           |

Table S1: MALDI-TOF calculated and observed masses of DNA sequences used.

\*An insufficient amount of labelled DNA was prepared to obtain an analytical HPLC

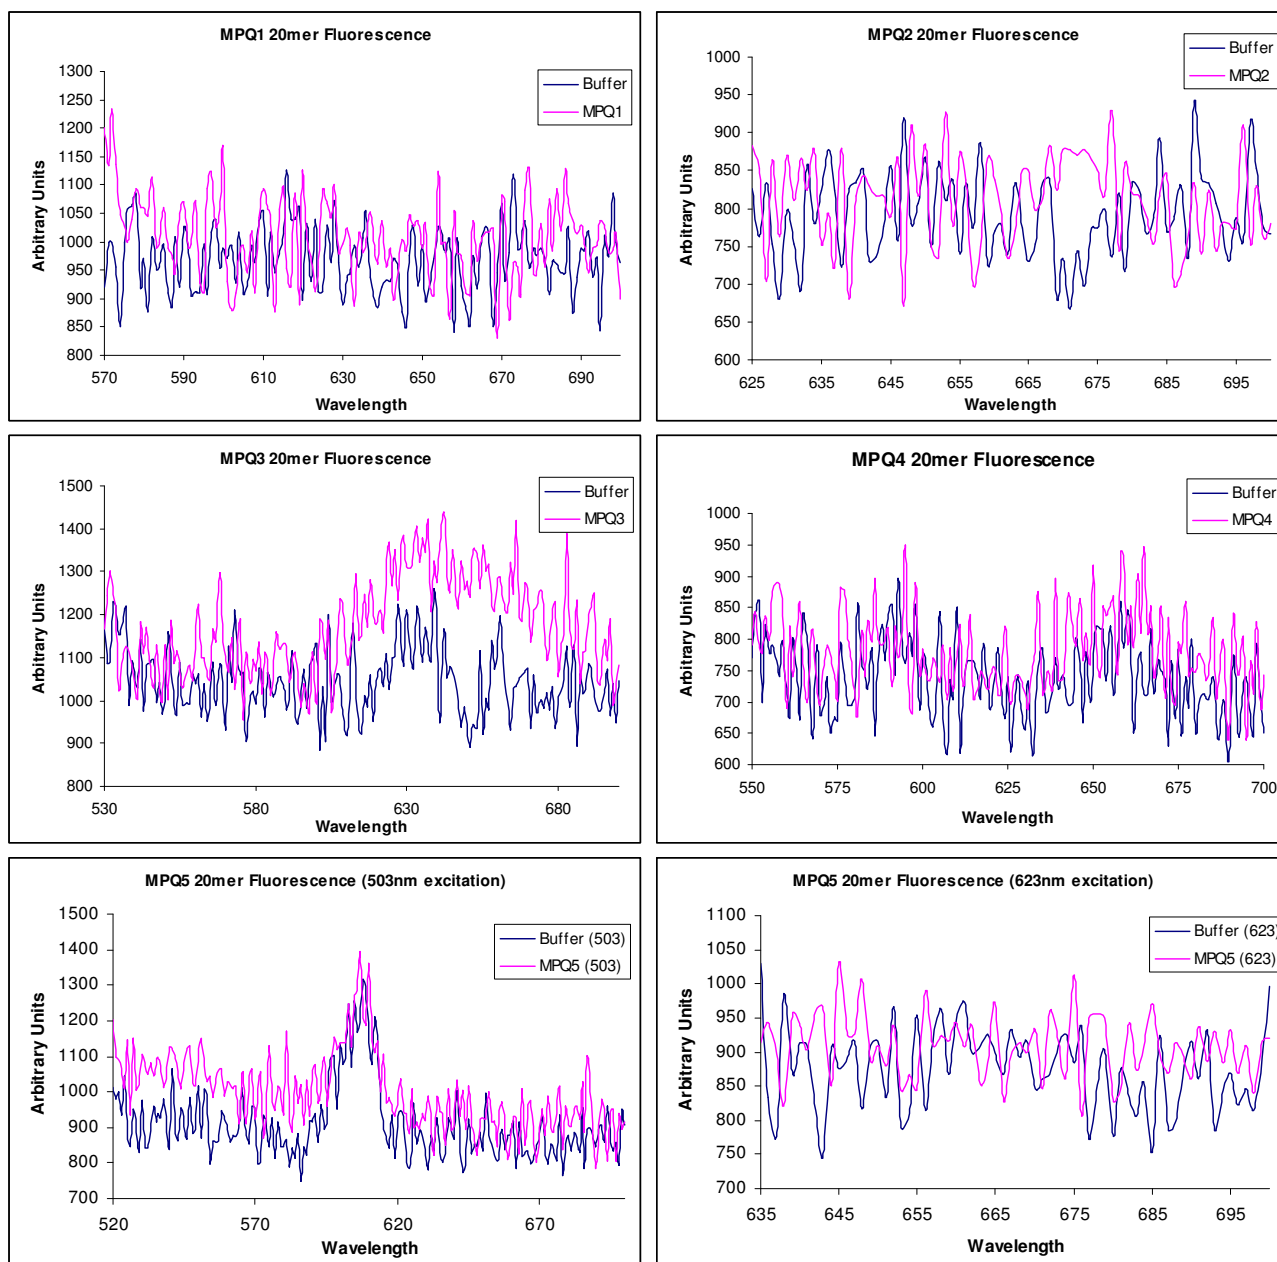

Figure S1: Fluorescence spectra of quencher 20mers (---) compared to buffer alone (---). Samples (100nM) were excited at the  $\lambda_{\text{max}}$  values indicated in Table XXXX.

| Quencher | $\lambda_{\max}$ | $\epsilon_{\max}$ | $\epsilon_{260}$ |
|----------|------------------|-------------------|------------------|
| MPQ1     | 512              | 36400             | 25100            |
| MPQ2     | 516              | 19200             | 10300            |
| MPQ3     | 517              | 50800             | 15000            |
| MPQ4     | 522              | 22600             | 10800            |
| MPQ5     | 617              | 8700              | 18200            |
| MPQ6     | 620              | 28700             | N.D.*            |

Table S2: Absorbance maxima and extinction coefficients (in  $\text{L M}^{-1} \text{cm}^{-1}$ ) for multiple pathway quenchers in ethanol.  $\epsilon_{260}$  values are provided for quenchers in 9:1 PBS:DMF

\* Value could not be determined as a result of aggregation. A value of  $8000 \text{ L M}^{-1} \text{cm}^{-1}$  was used in DNA concentration calculations (the value of BHQ1 at 260 nm).



Figure S2: Ground state complex formation between MPQ 20mers and 3'-Fluorescein 20mer. Duplexes were formed by annealing a solution 1  $\mu$ M of each strand in hybridization buffer at 70  $^{\circ}$ C for 5 minutes then allowing to cool to room temperature over 30 minutes. The simple sum was created by adding solutions containing only 1  $\mu$ M of either quencher or fluorophore labelled strand.

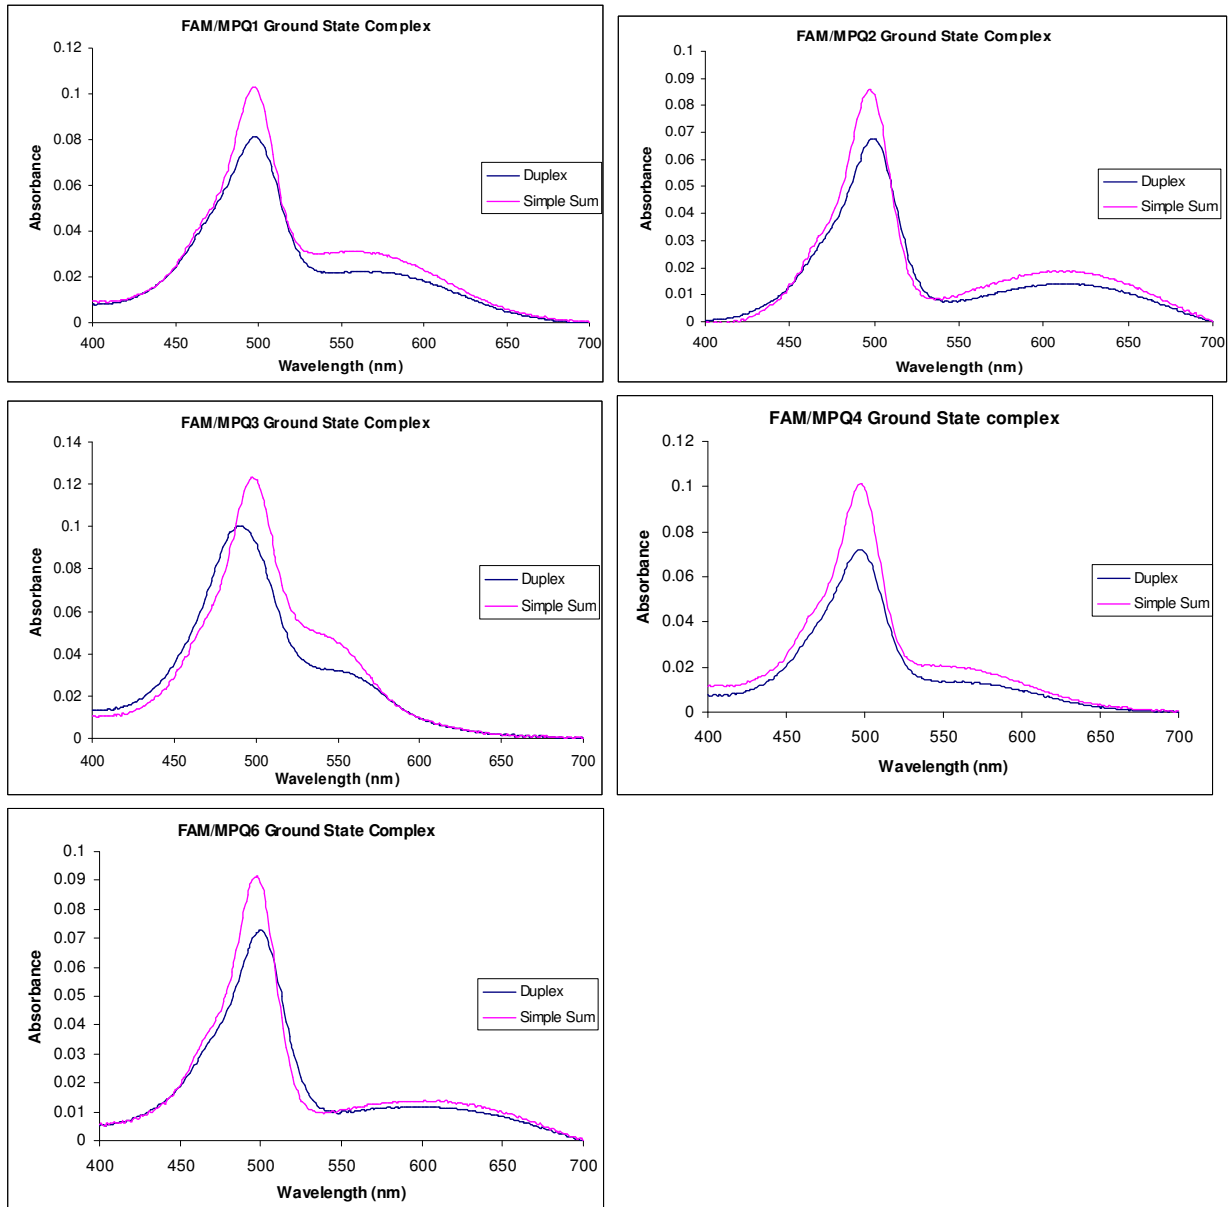

Figure S2: Ground state complex formation between 5'-Dabcyl or 5'-BHQ2 15mers and 3' Fluorophore labelled 20mers. Duplexes were formed by annealing a solution 1  $\mu$ M of each strand in hybridization buffer at 70  $^{\circ}$ C for 5 minutes then allowing to cool to room temperature over 30 minutes. The simple sum was created by adding solutions containing only 1  $\mu$ M of either quencher or fluorophore labelled strand.

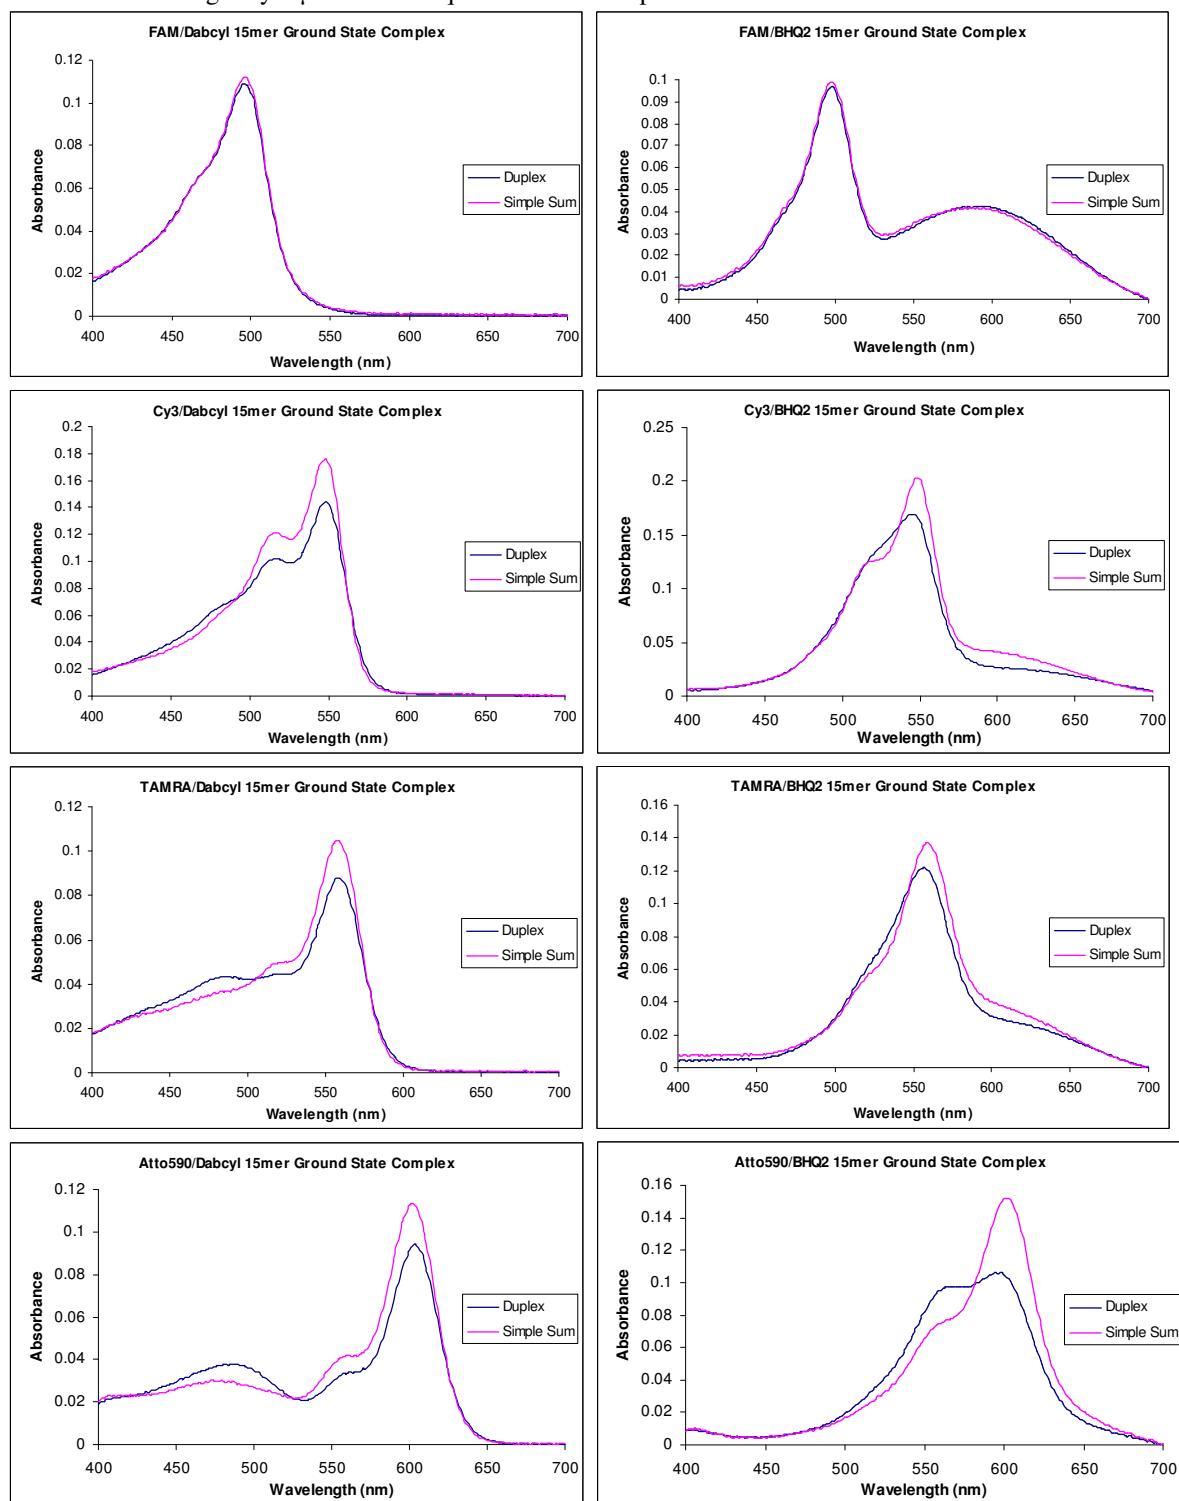

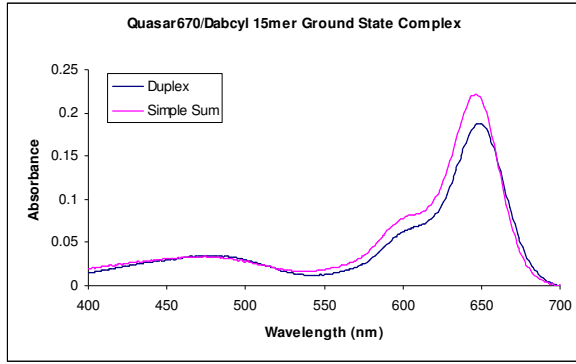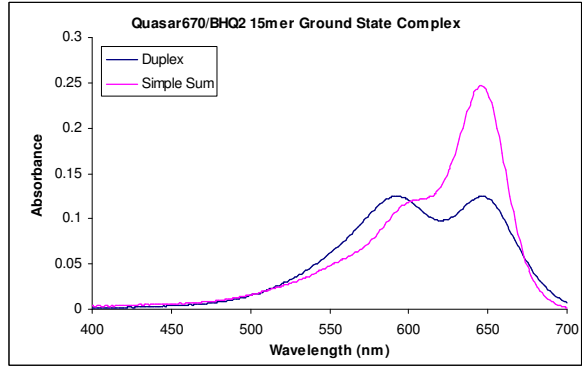

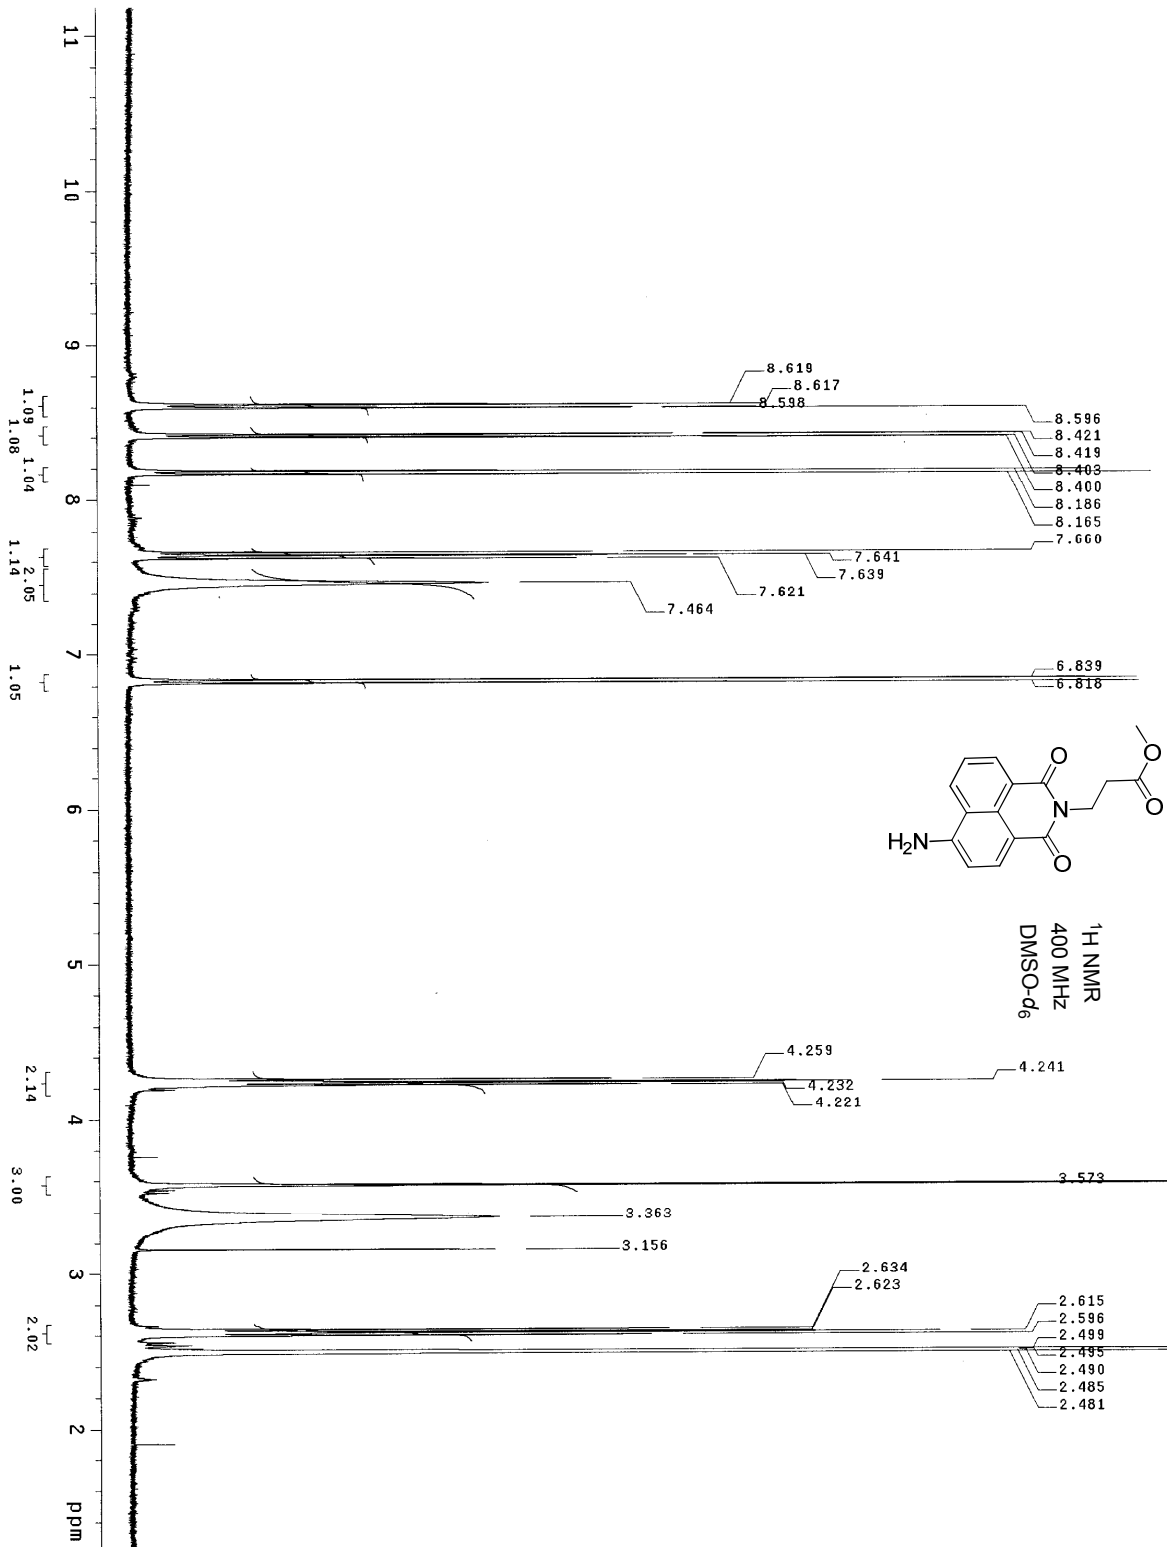



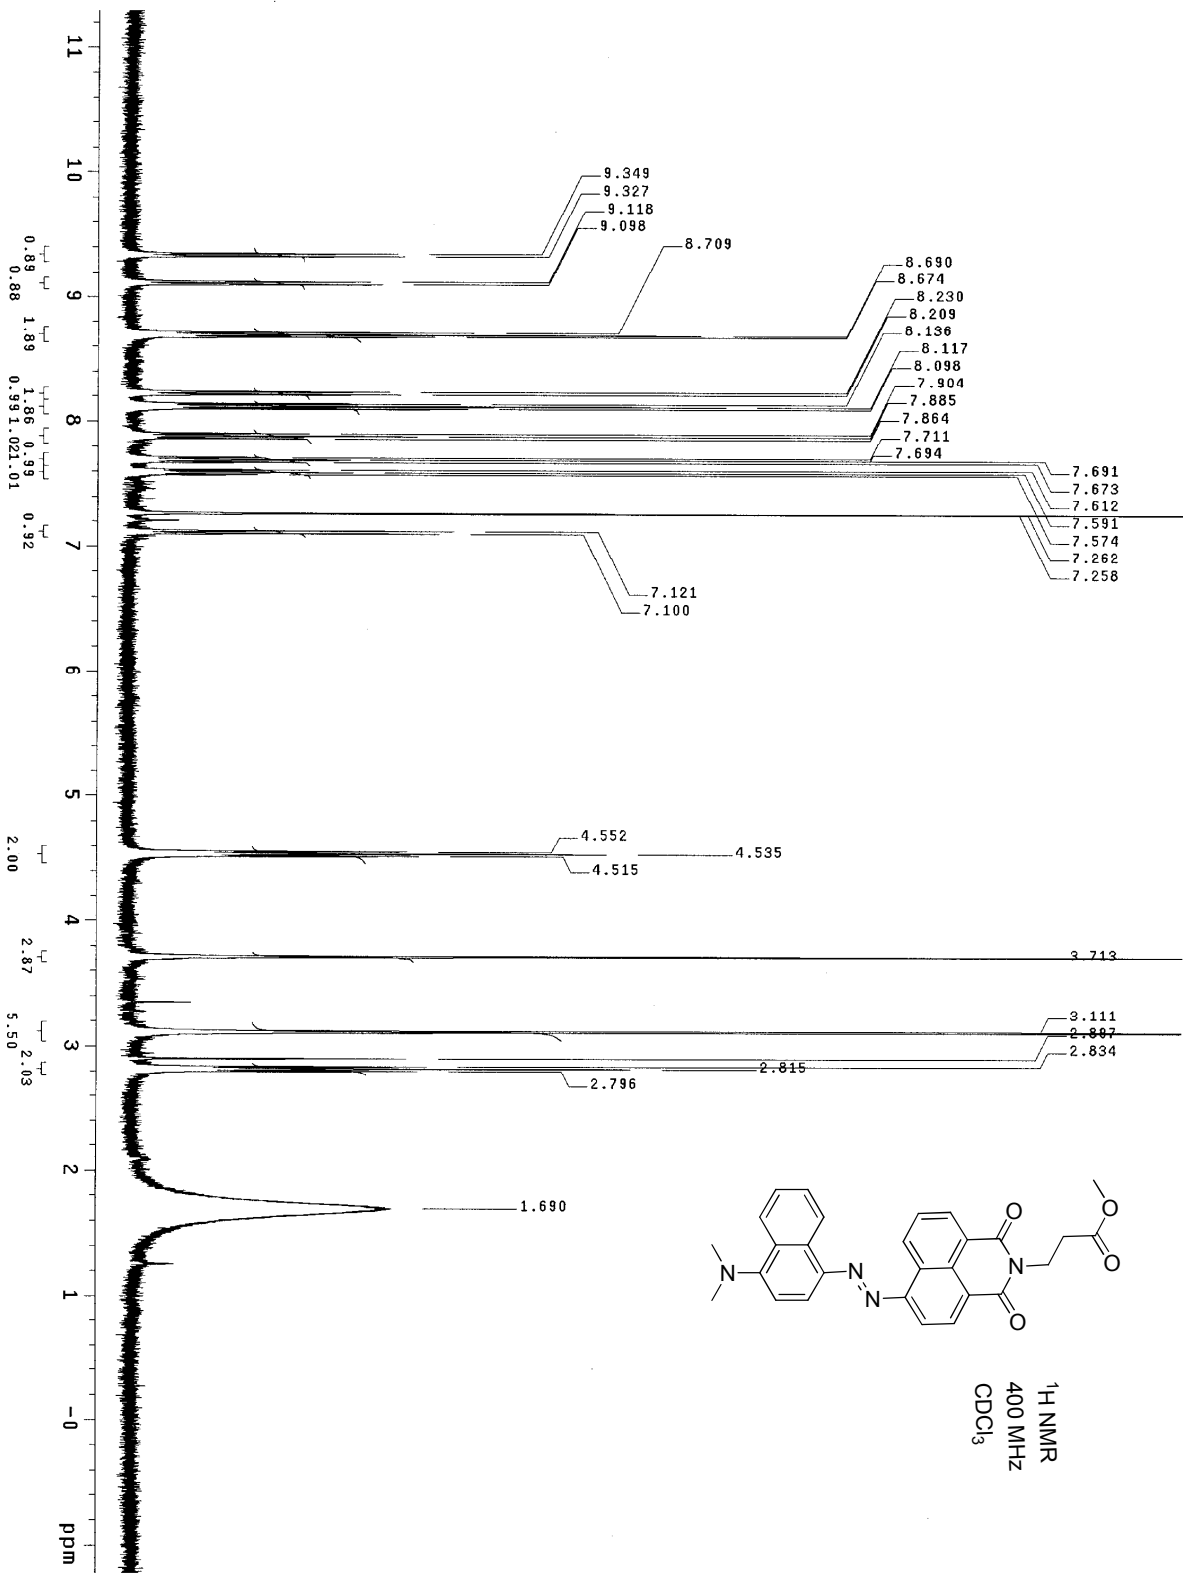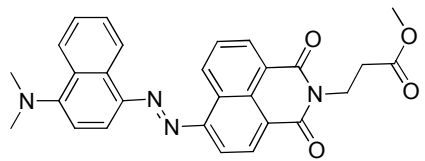

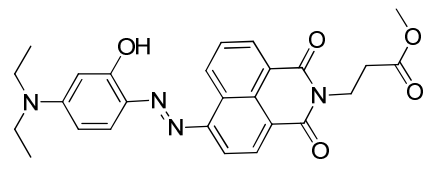

<sup>1</sup>H NMR  
400 MHz  
CDCl<sub>3</sub>

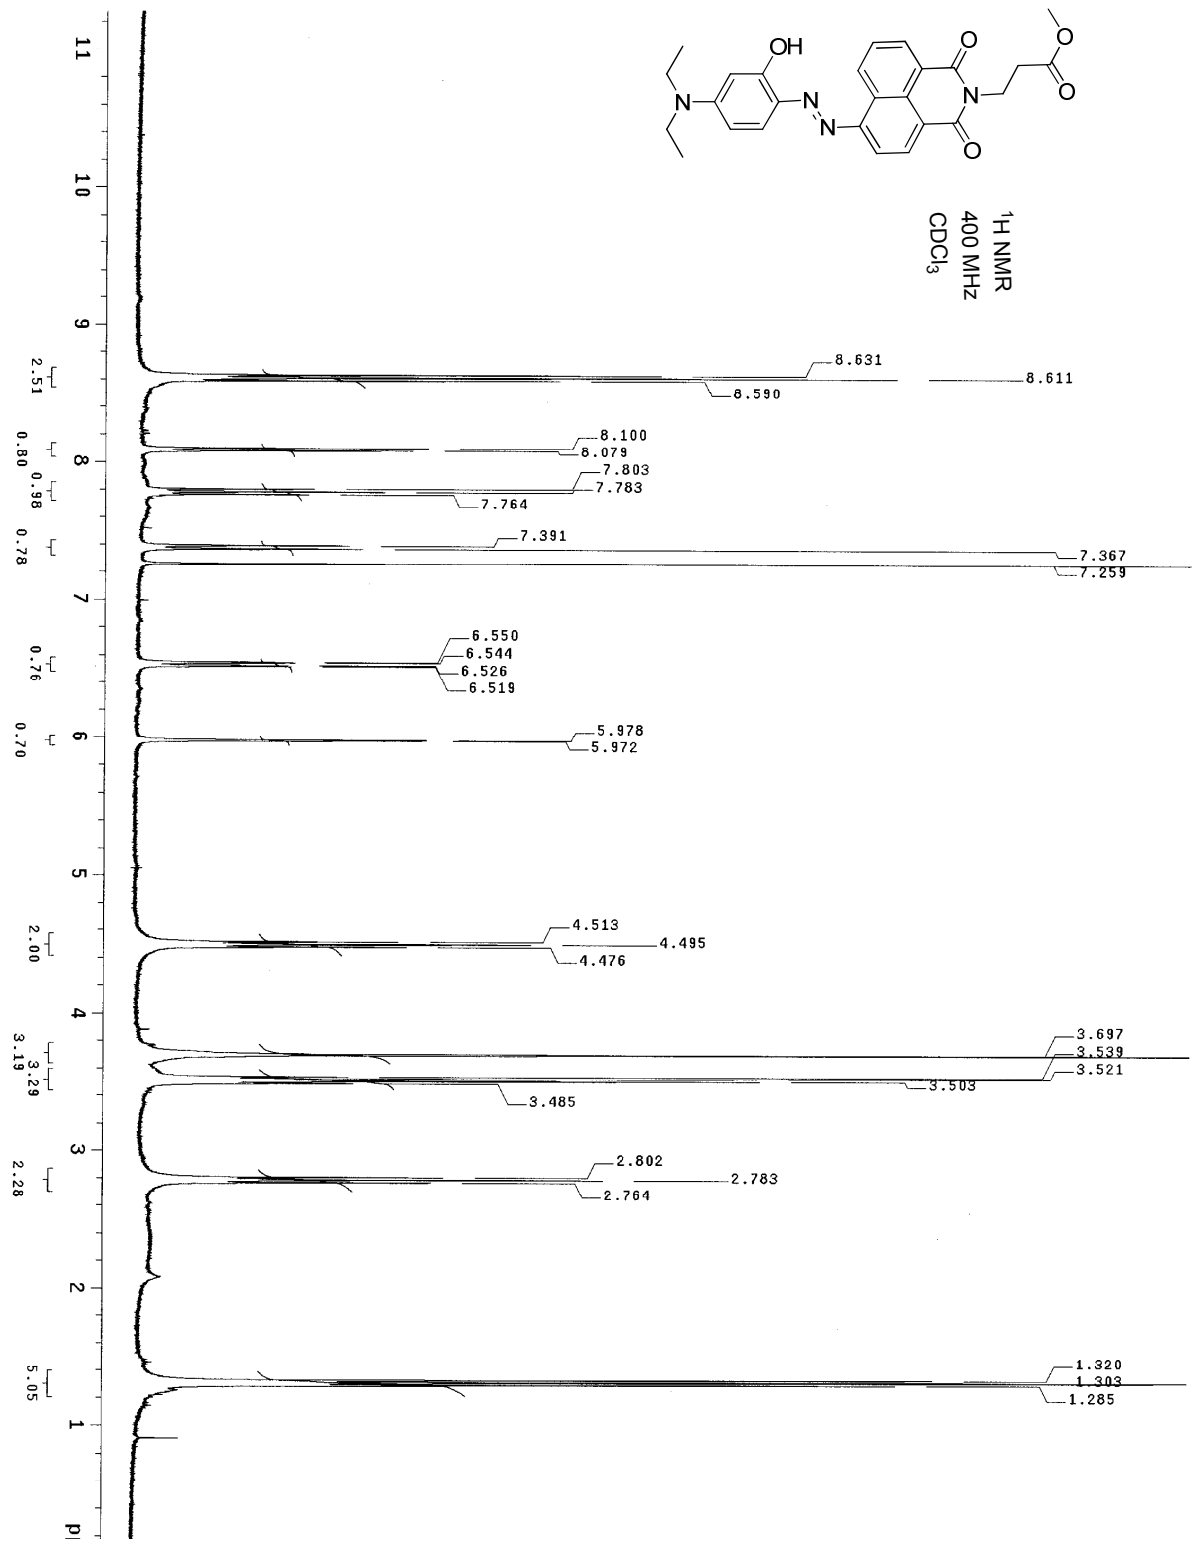

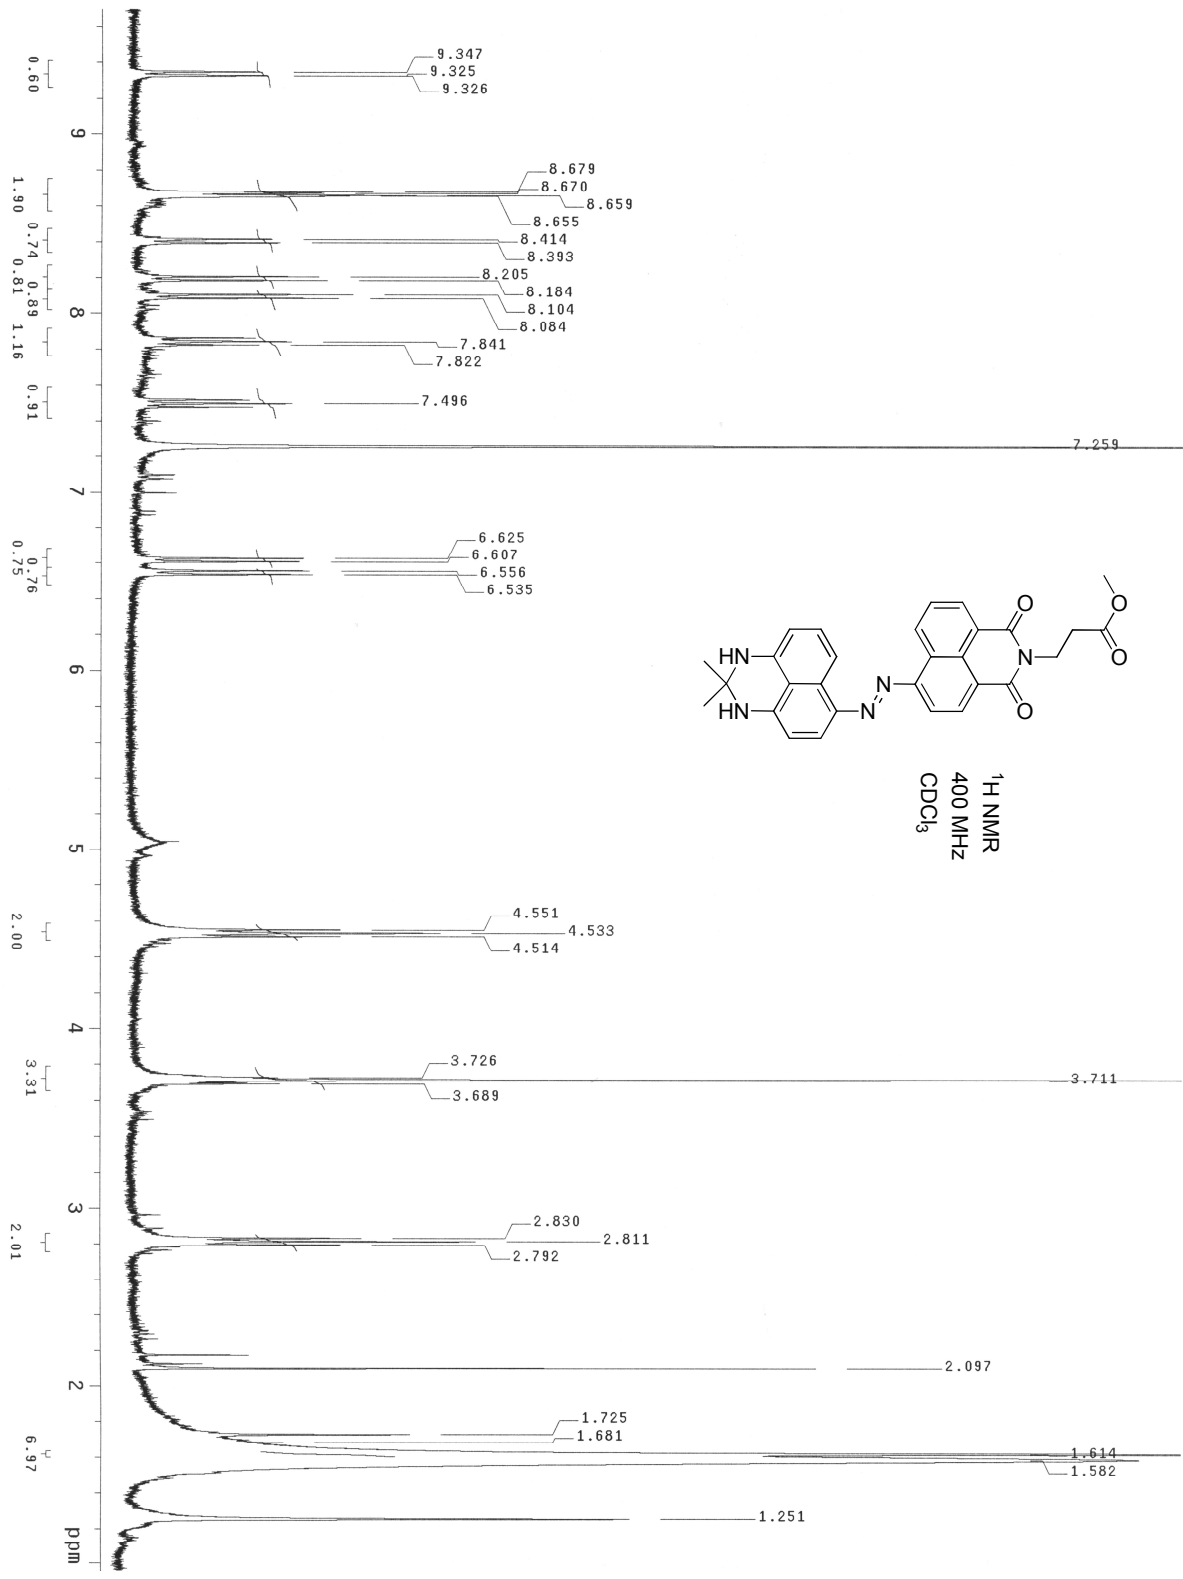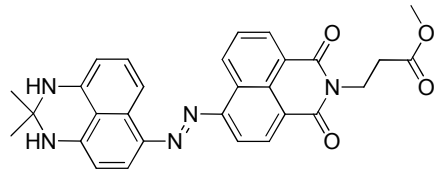



STANDARD 1H OBSERVE

expi stdih

SAMPLE DEC. & VT  
date Jun 28 2011 dfrq 400.115  
solvent DMSO d1 11  
t1 ACQUISITION 400.115 d1 11  
sfrq 400.115 dof 30  
in H1 dm 0  
at 4.002 dmf 200  
np 40000 wfile  
sw 4897.5 wfile  
fb not used proc  
bs 4 fn  
tpwr 61  
pw 7.0 werr  
d1 0.500 wexp  
tof 0 wds  
nt 18 wnt  
s 10  
atlock not used  
gain not used  
flags not used  
i1 n  
in n  
dp Y  
DISPLAY  
sp 239.1  
vp 3762.8  
vs 200  
sc 0  
vc 250  
h2mm 15.05  
is 223.42  
f1 143.47  
rfp 1896.3  
th 20  
ins 3.000  
nm cdc ph

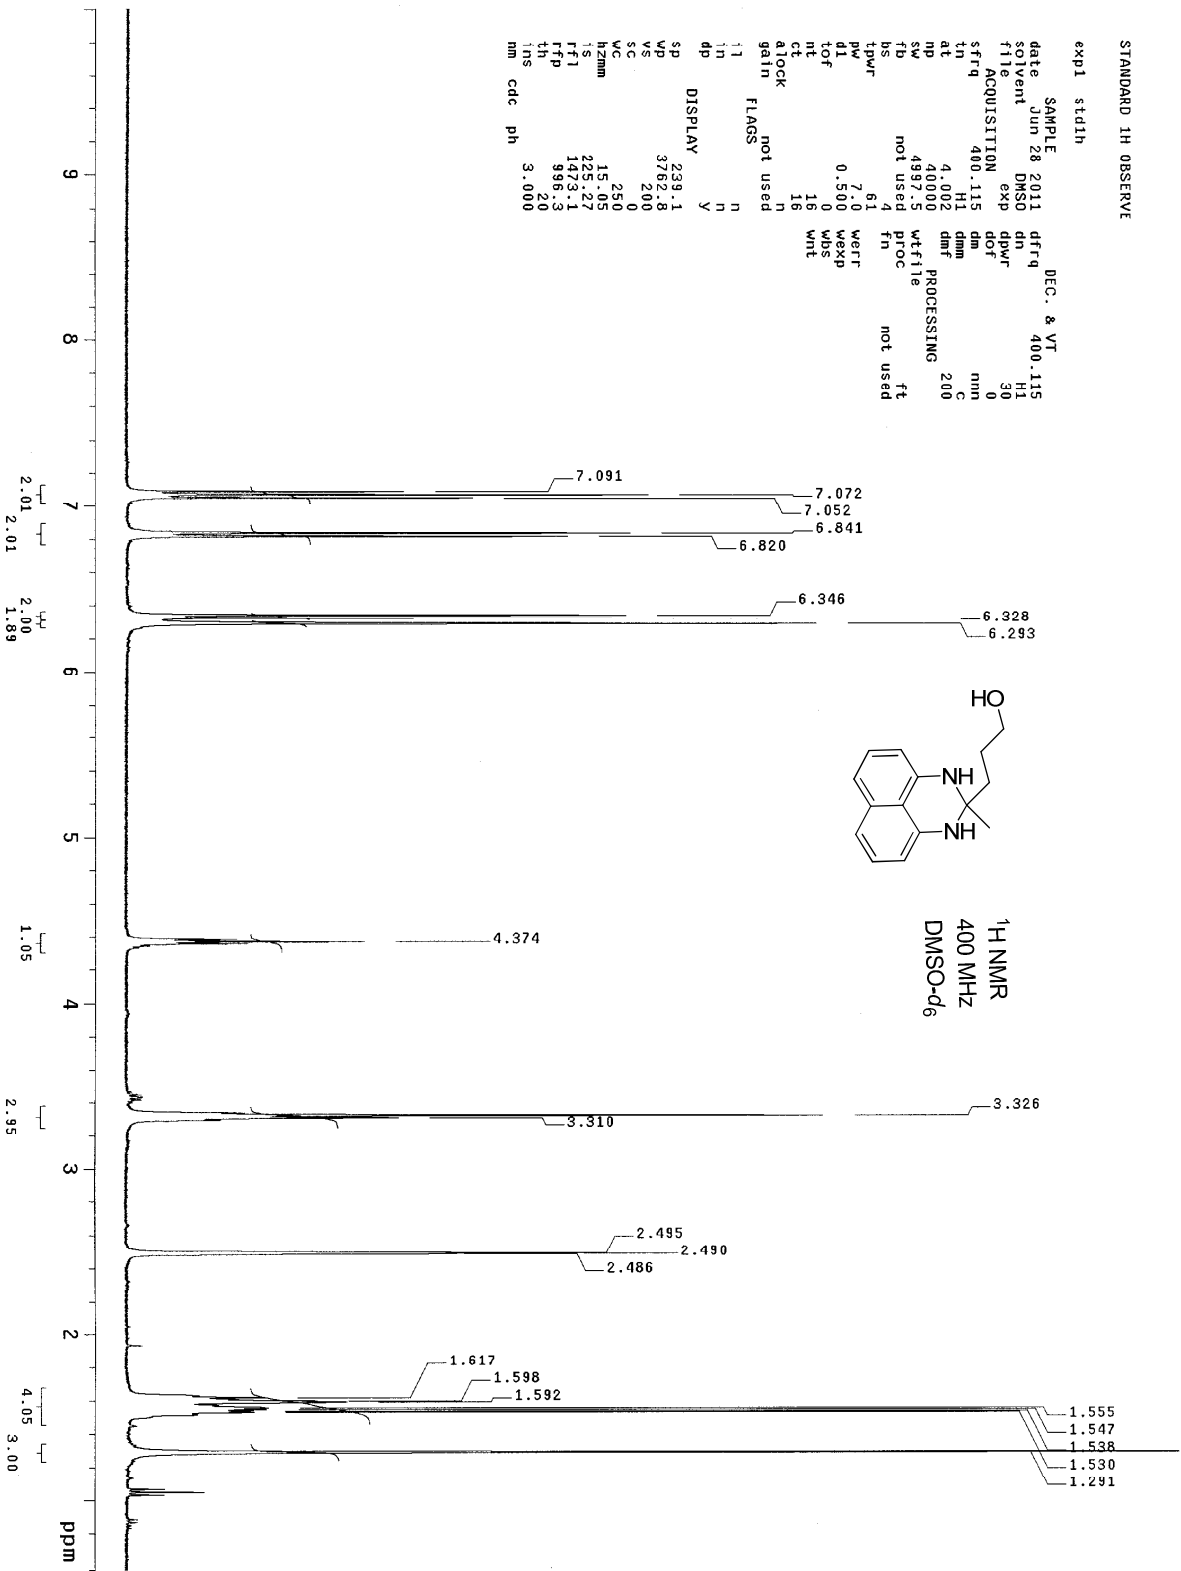

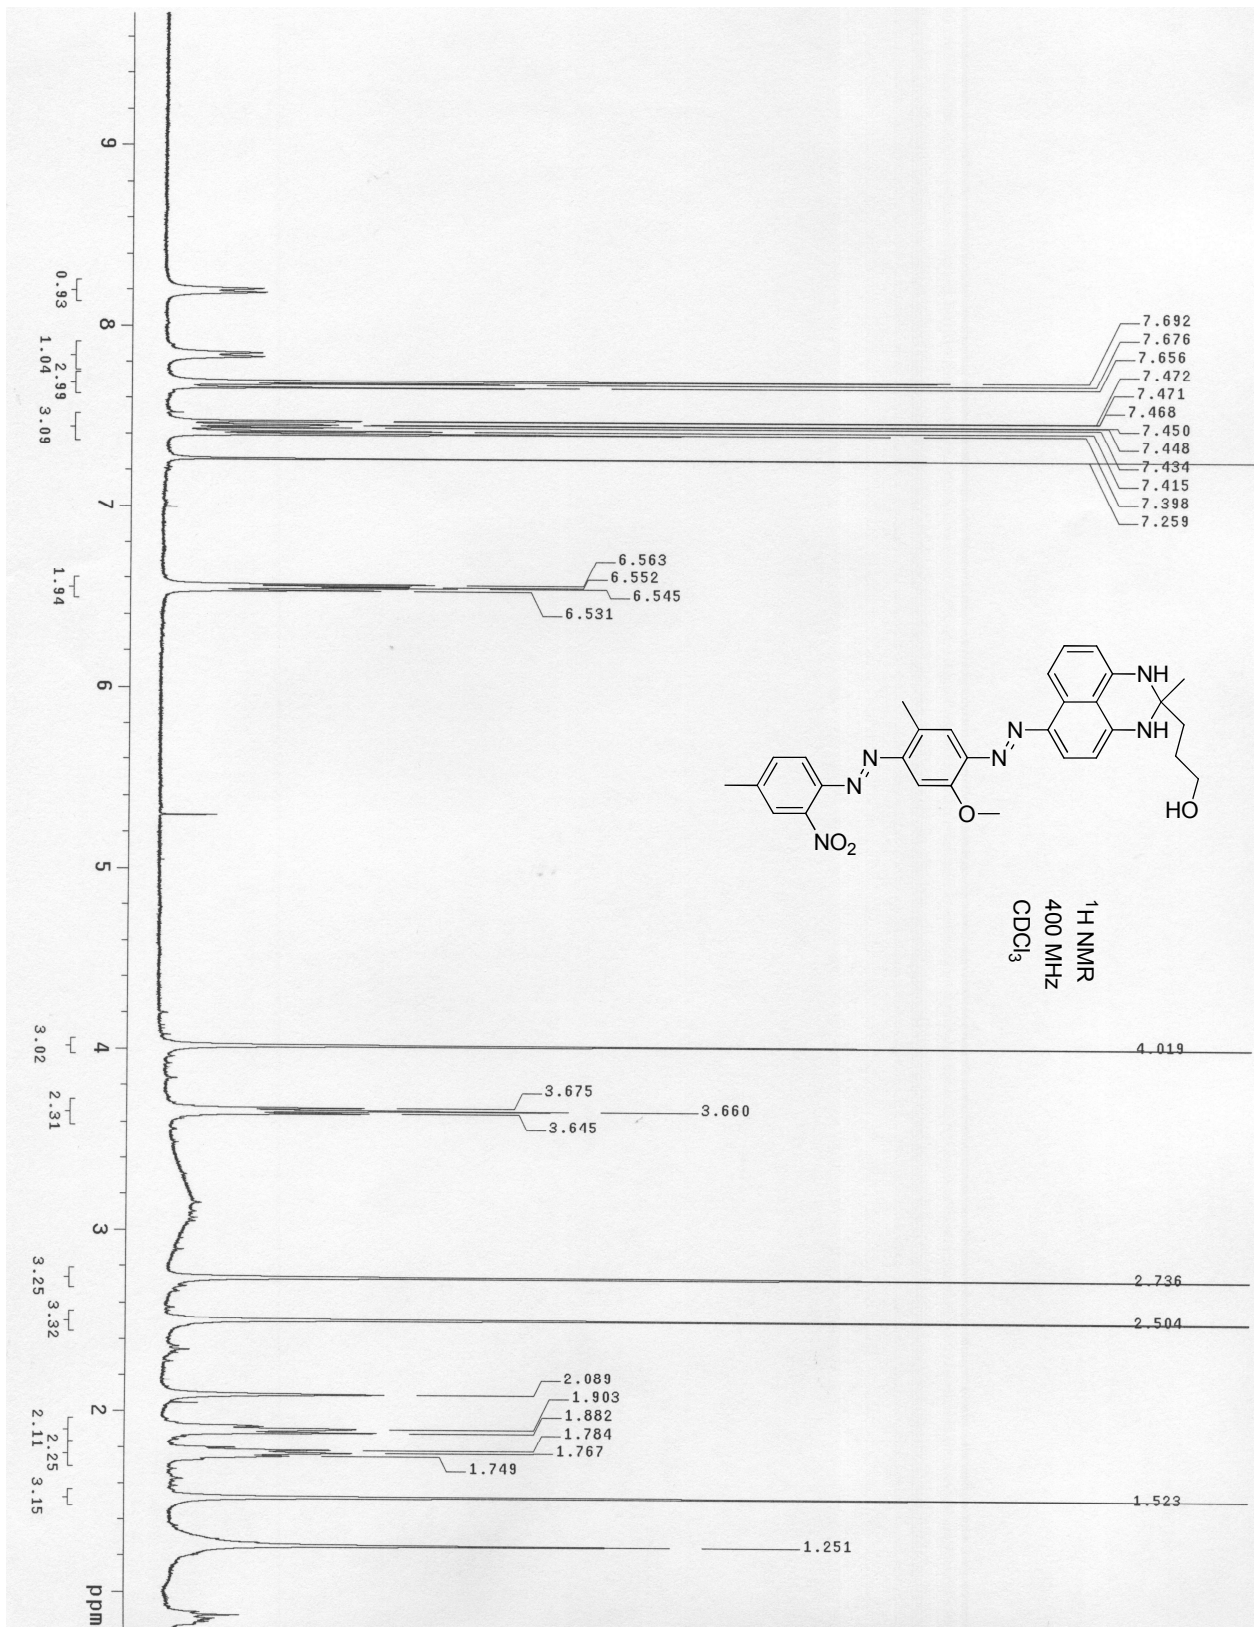

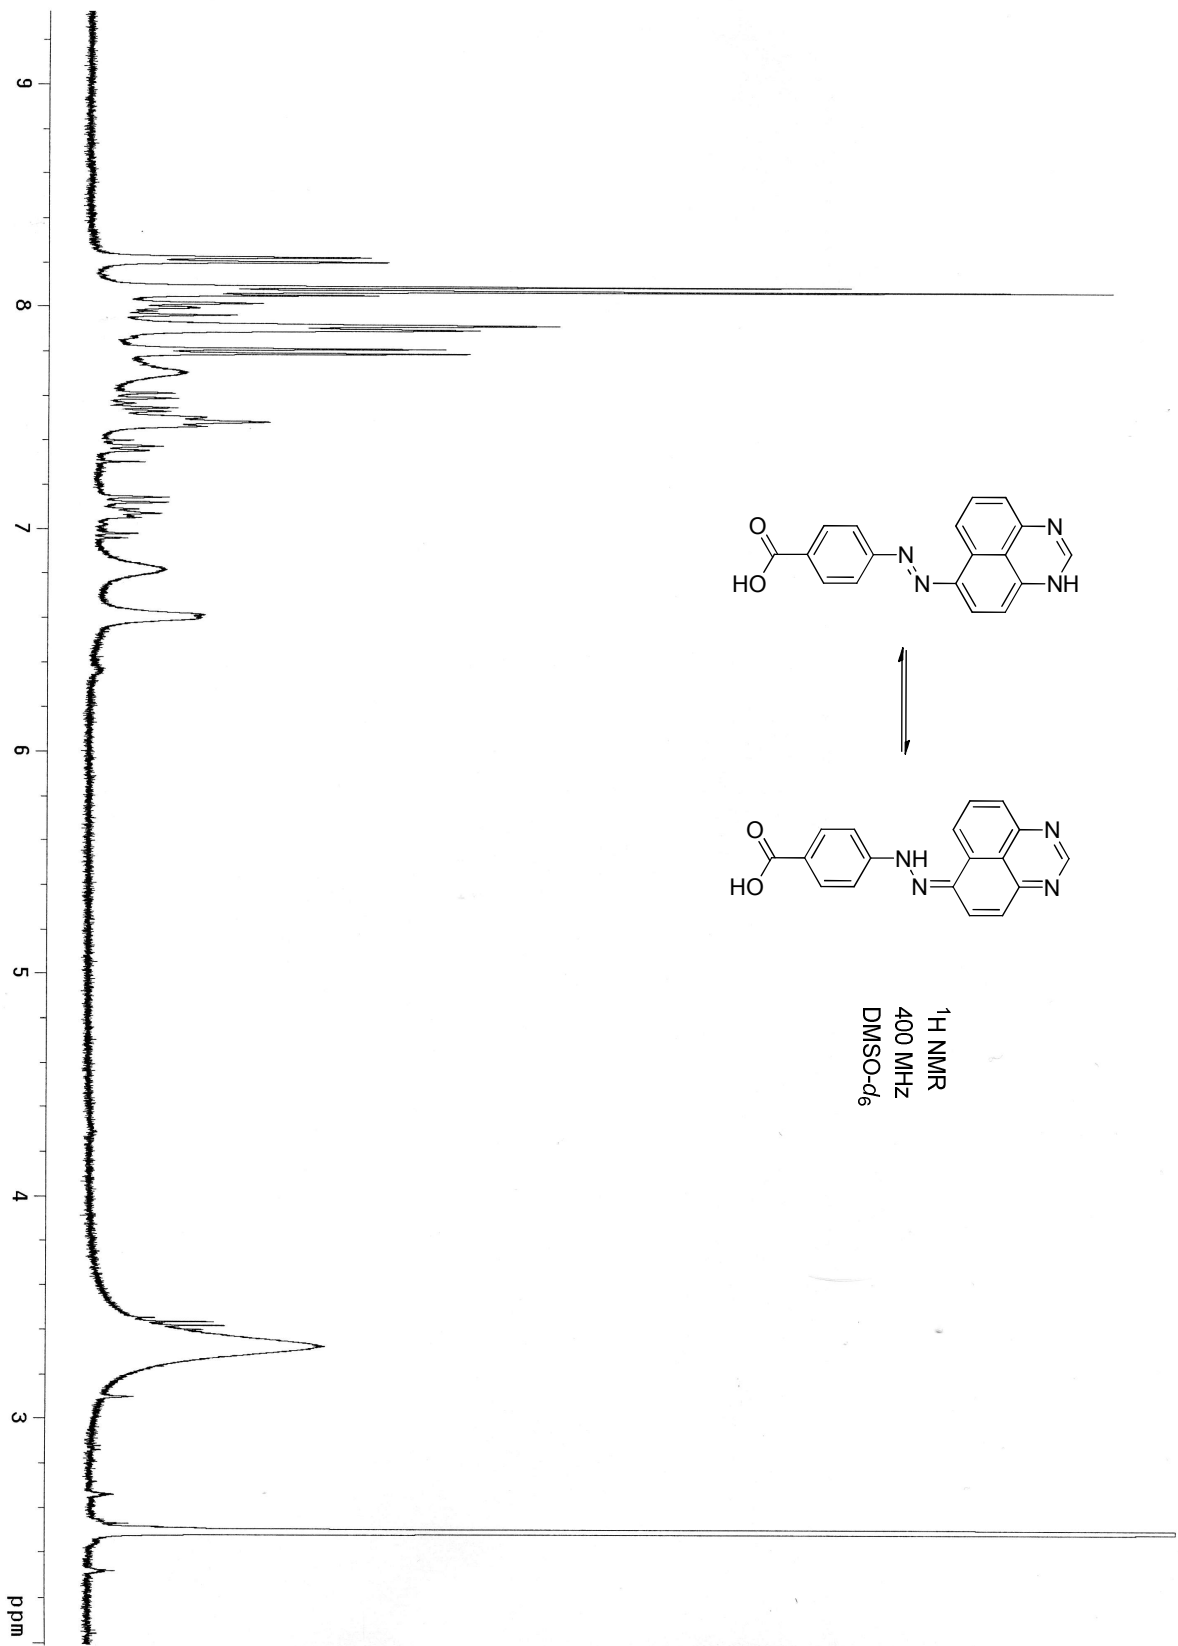

13C OBSERVE

expl sid13c

SAMPLE Jun 28 2011 DEC. & VI  
 date 2011 dfrq 400.115  
 solvent DMSO dn H1  
 file ACQUISITION exp dpwr 43  
 sfreq 100.618 dm 0  
 tt 1.133 dmm YYY  
 at 59668 dmf W  
 np 25000.0 W  
 sw 13800 lb PROCESSING 0.50  
 bs 16 wffile ft  
 tpwr 59 fn not used  
 pw 5.5 werr  
 d1 0.500 wexp  
 nt 1024 wbs  
 ct 256 wnt  
 atlock n  
 gain 36  
 flags

DISPLAY  
 sp -3044.2  
 wd 24999.2  
 vs 952  
 sc 0  
 wc 250  
 hzmm 100.00  
 ts 500.00  
 rftl 3045.0  
 rfp 0  
 th 20  
 tns 100.000  
 nm no ph

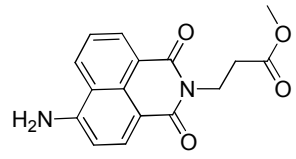

<sup>13</sup>C NMR  
 100 MHz  
 DMSO-d<sub>6</sub>

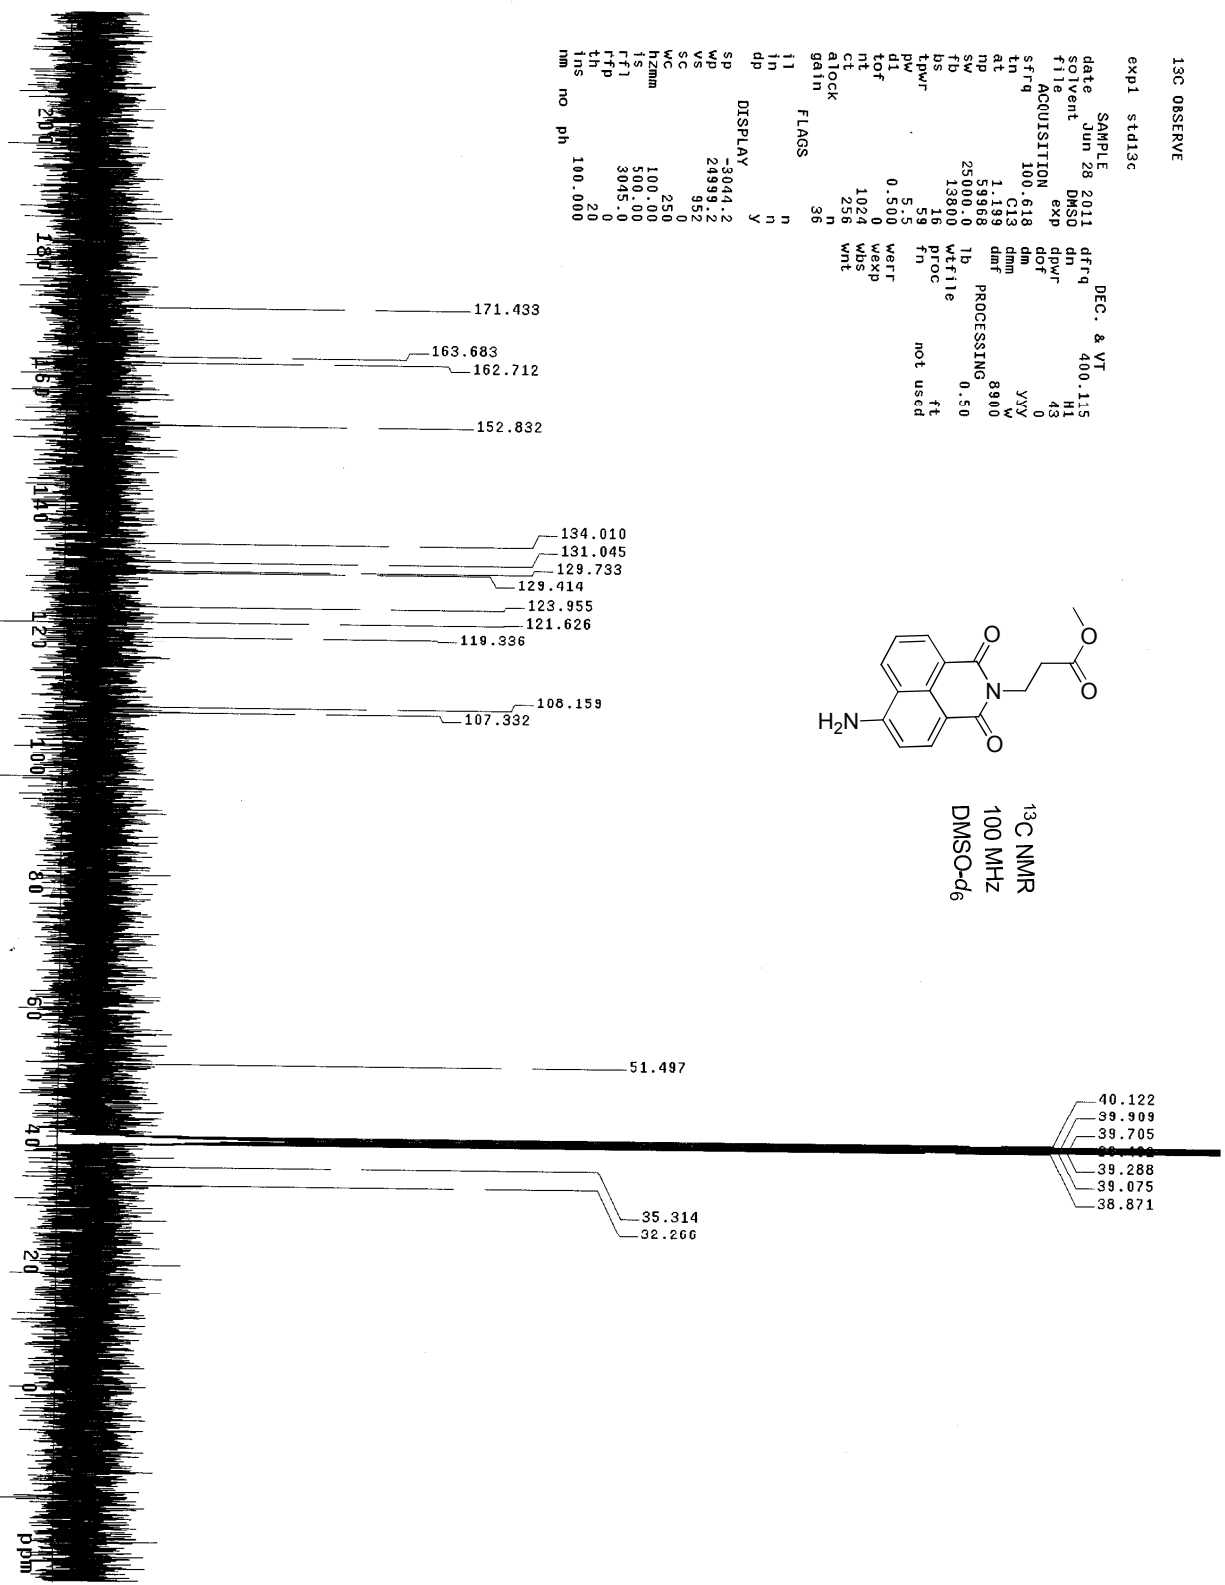

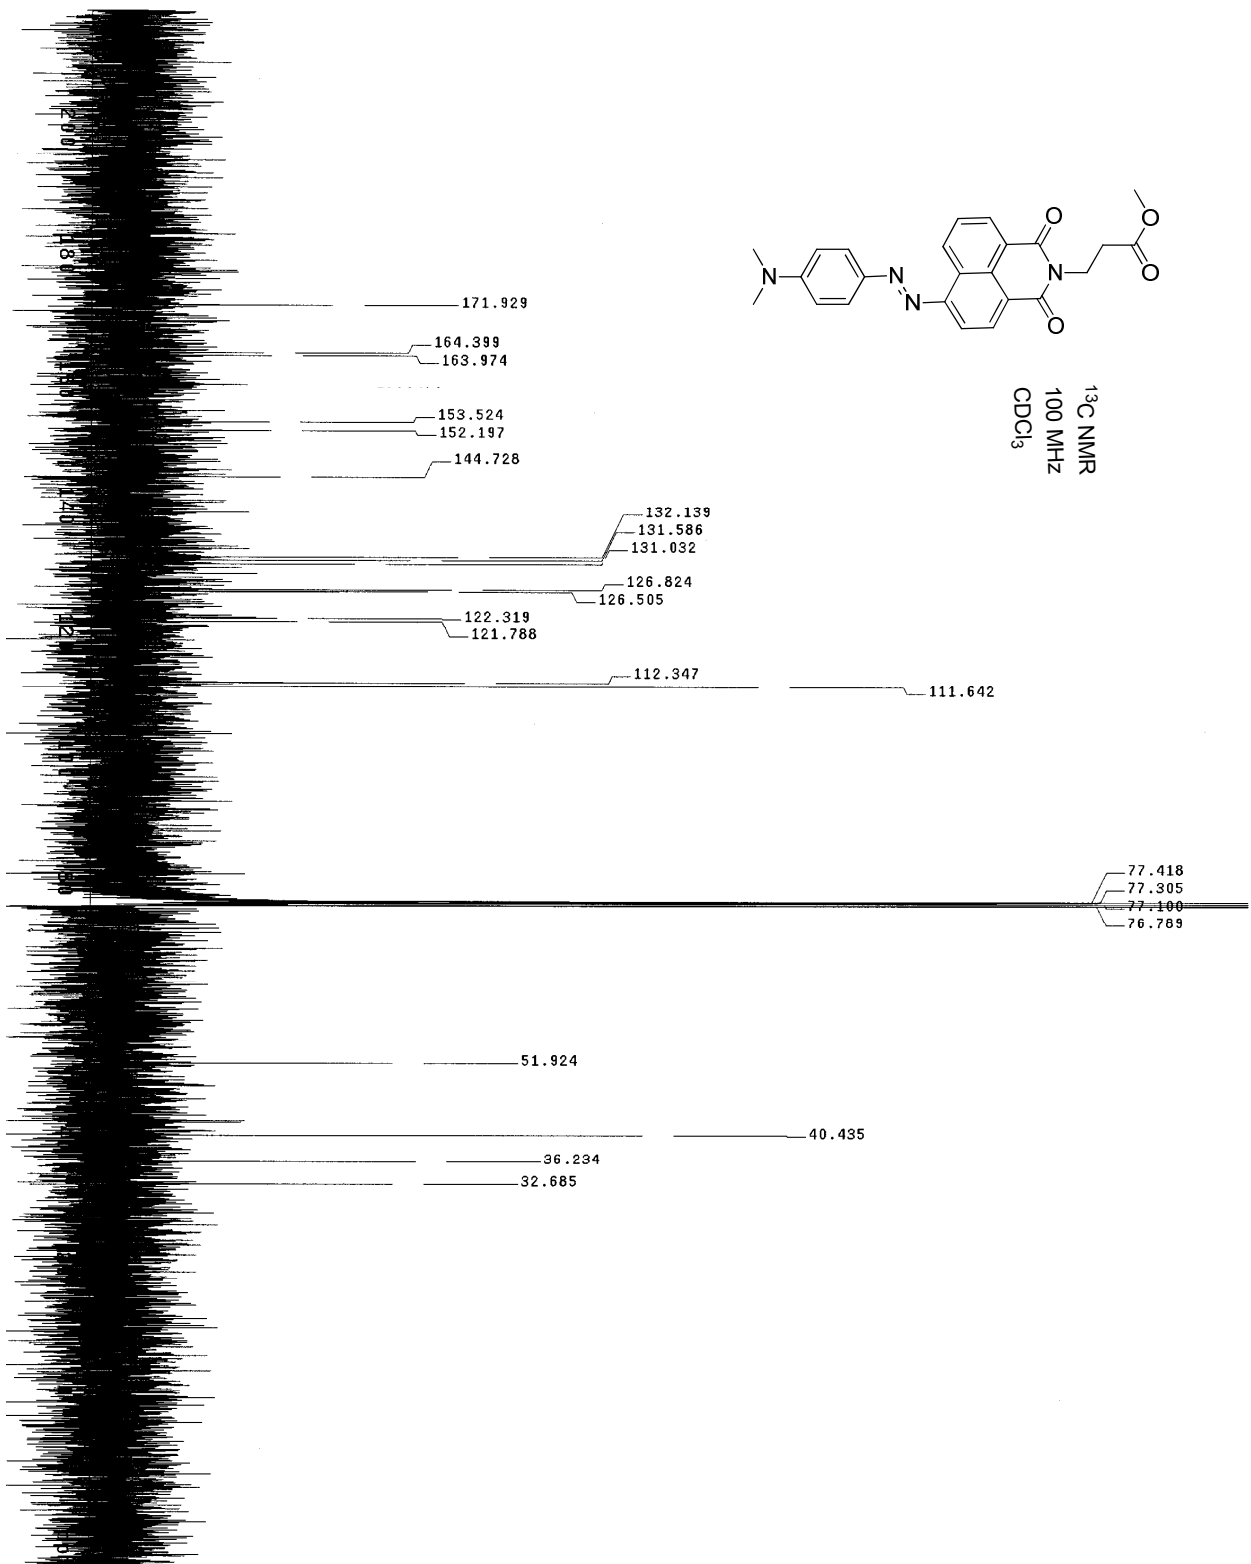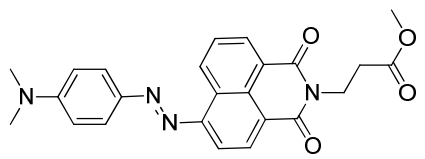

<sup>13</sup>C NMR  
100 MHz  
CDCl<sub>3</sub>

171.929

164.399  
163.974

153.524  
152.197

144.728

132.139  
131.586  
131.032

126.824  
126.505

122.319  
121.788

112.347

111.642

77.418  
77.305  
77.100  
76.789

51.924

40.435

36.234  
32.685

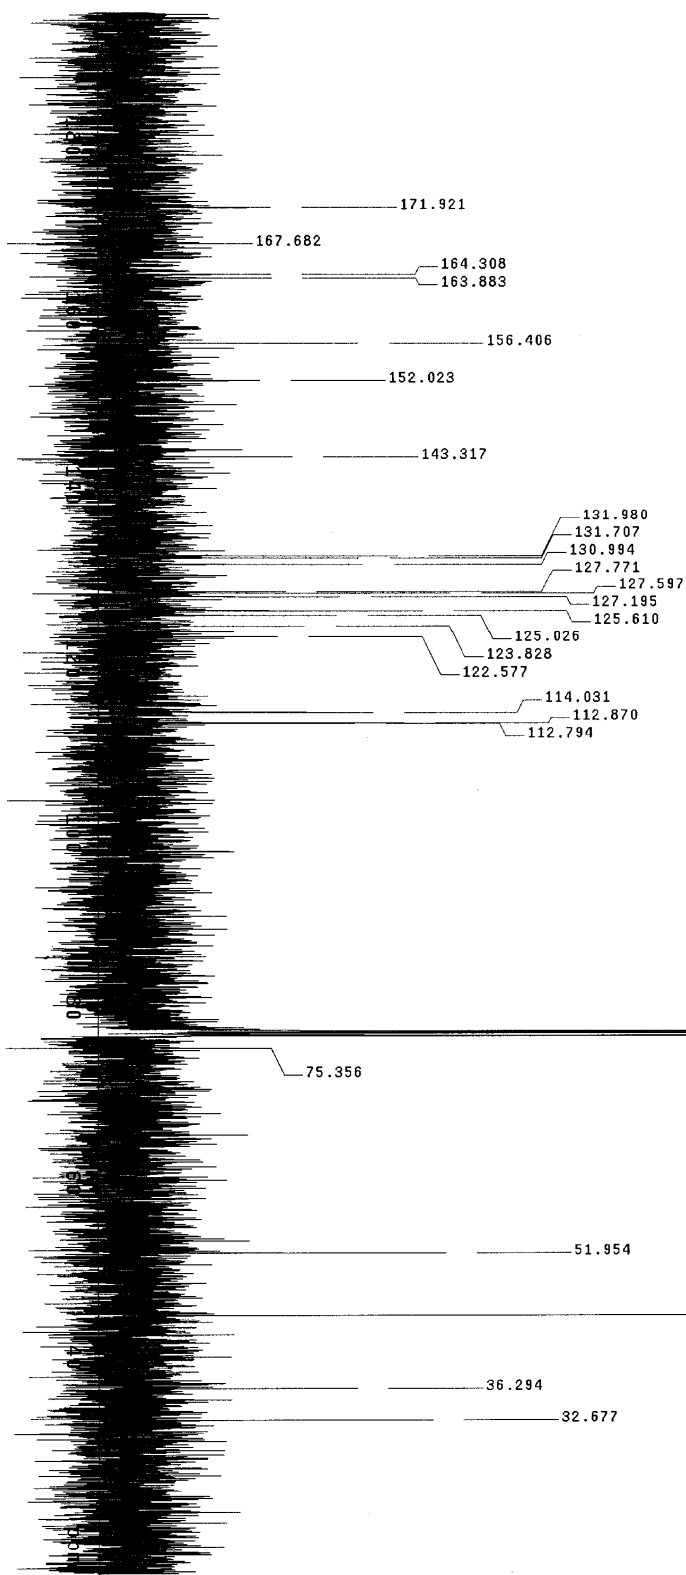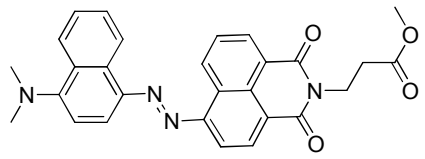

<sup>13</sup>C NMR  
100 MHz  
CDCl<sub>3</sub>

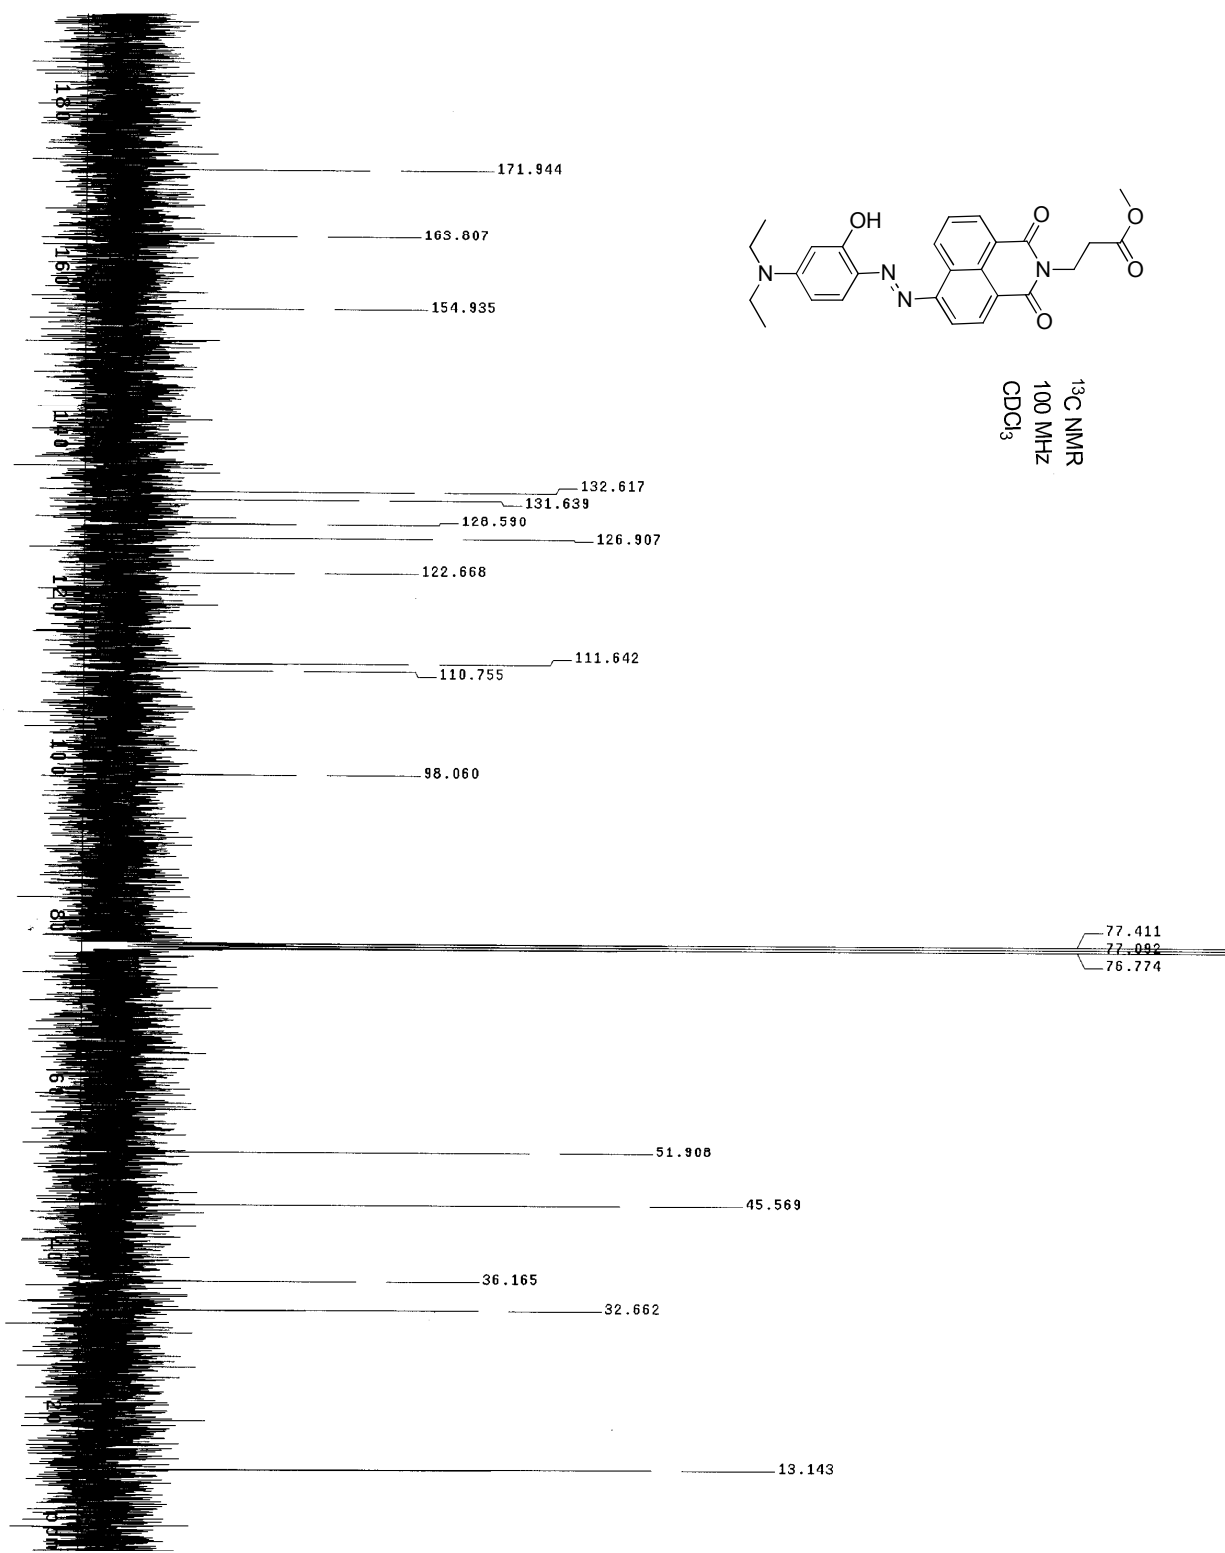

13C OBSERVE

exp1 std13c

SAMPLE DEC. & VT  
 date Jun 28 2011 dfreq 400.115  
 solvent DMSO dn H1  
 file exp dpwr 43  
 ACQUISITION dof 0  
 sfreq 100.618 dm yyy  
 tn C13 dnm  
 dt 1.189 dmf PROCESSING 0.50  
 np 5.890 lb  
 sp 250000 wf file  
 fb 13800 16 proc  
 bs 16 fn not used  
 tavr 5.5  
 pw 0.500 weff  
 dl 0 wexp  
 tof 1024 wbs  
 nt 176 wht  
 ct 176  
 alock n  
 gain n  
 i1 36  
 in n  
 dp n

DISPLAY y  
 sp -3044.2  
 wp 2499.2  
 vs 558  
 sc 0  
 wc 250  
 hzmm 3.15  
 f1 50.15  
 f2 701.90  
 rfd 3974.0  
 tlb 20  
 lns 100.000  
 mm no ph

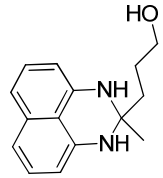

<sup>13</sup>C NMR  
 100 MHz  
 DMSO-d<sub>6</sub>

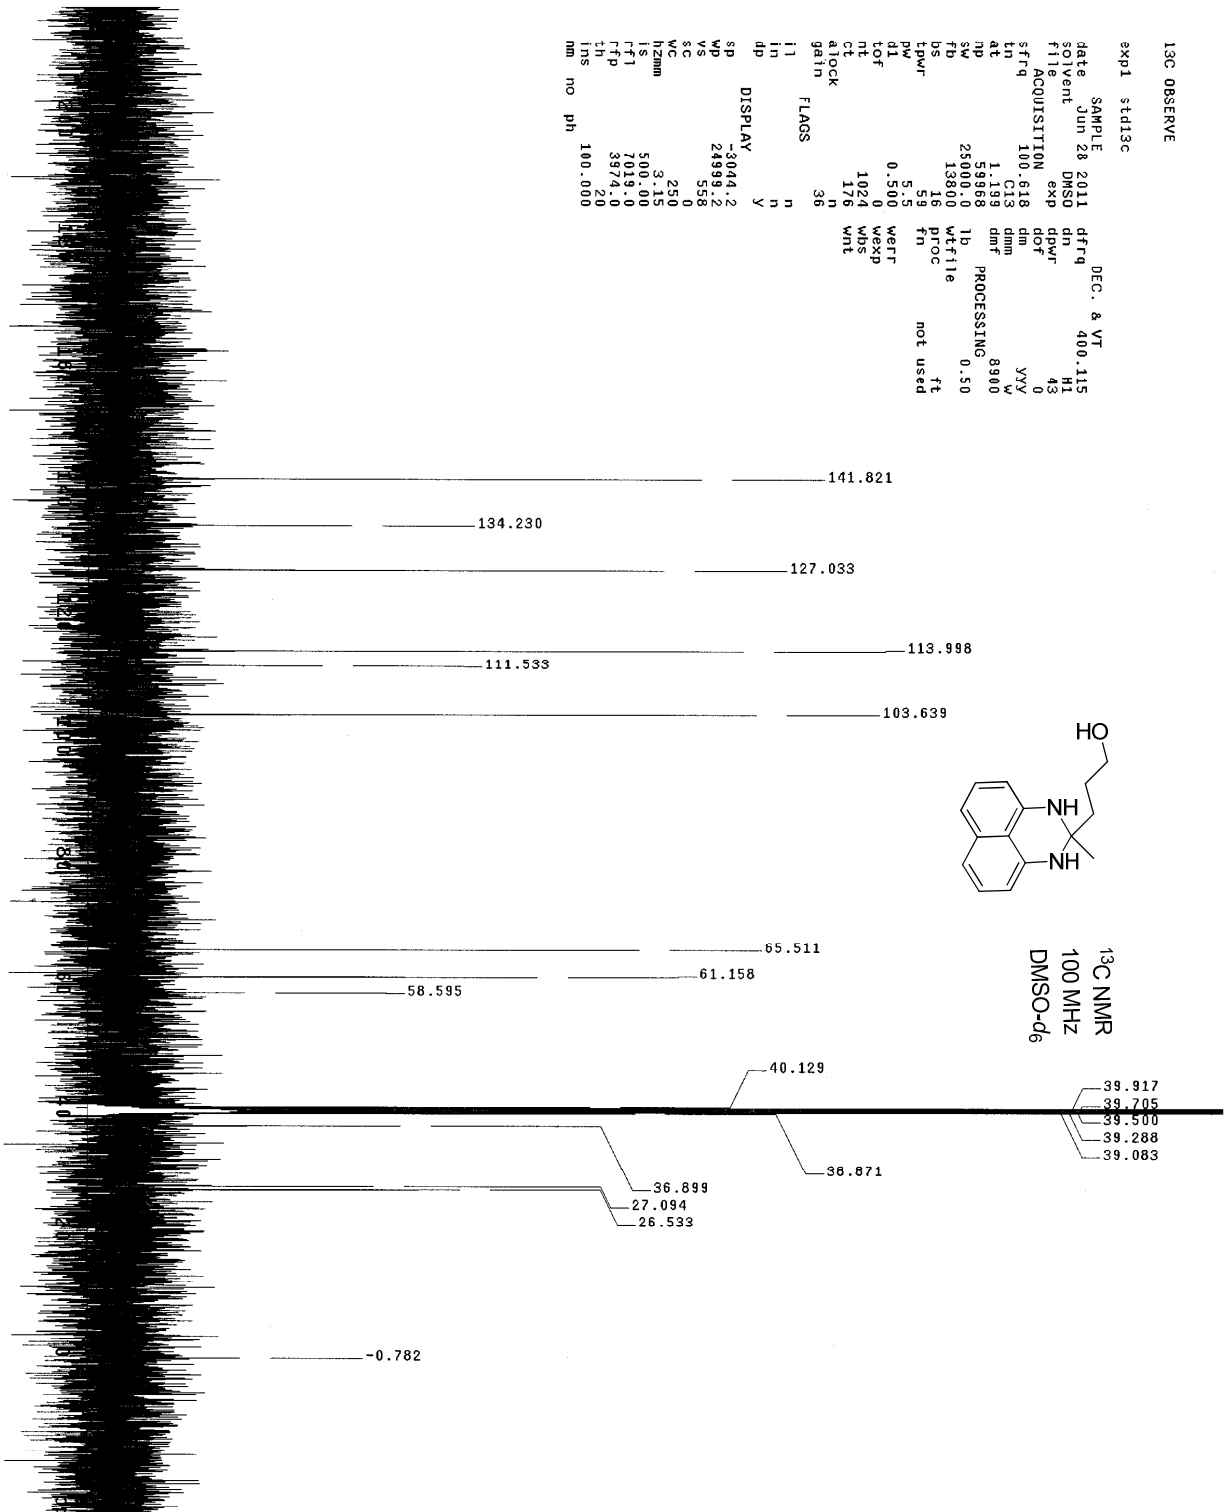



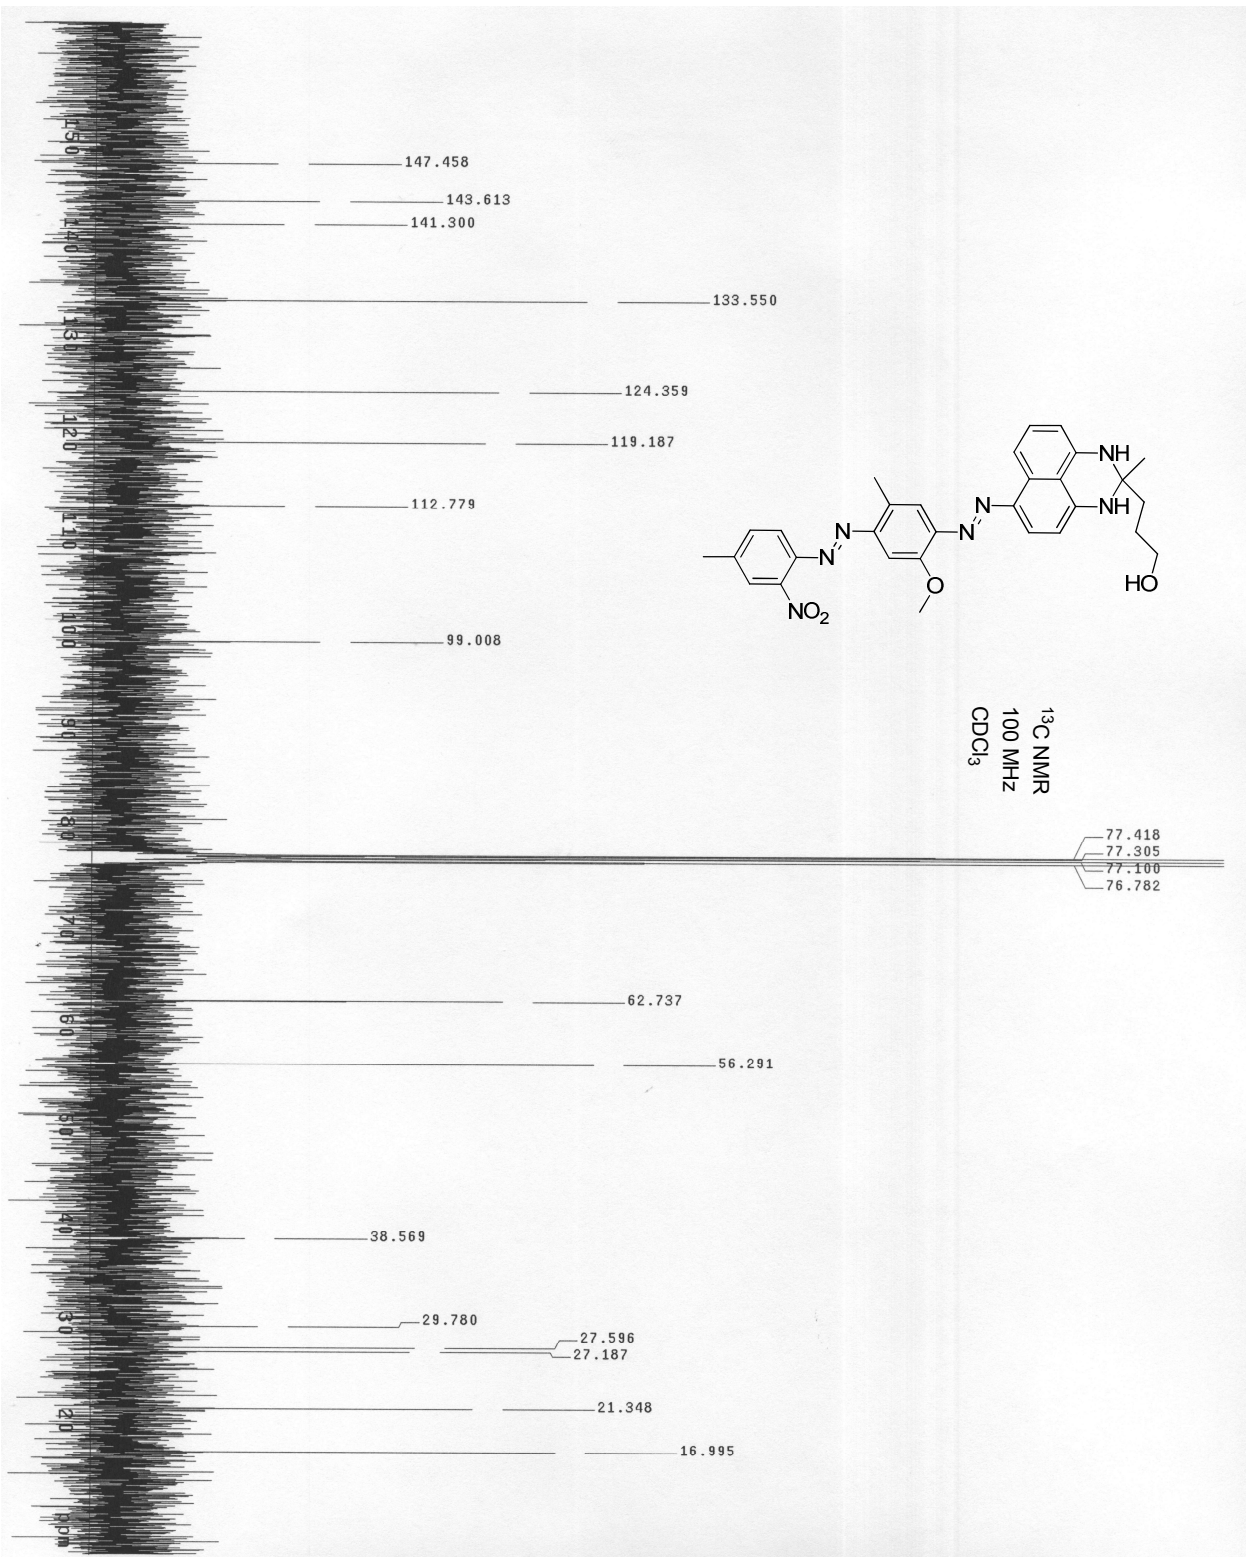

Supplement: NIHMS335564-supplement-1_si_001.pdf [file NIHMS335564-supplement-1_si_001.pdf]
